# Supplementary material for: Irrigation of Young Olives Grown on Reclaimed Karst Soil Increases Fruit Size, Weight and Oil Yield and Balances the Sensory Oil Profile
Source: MDPI journal article supplement (doi:10.3390/foods11182923), 2022-09-19
Supplement: s1 [file s1]

## SUPPLEMENTARY MATERIAL

**Supplemental Figure S1.** Monthly mean temperature, precipitation sum and evapotranspiration during the (a) 2015, (b) 2016, (c) 2017 and (d) Walter-Lieth climate diagram

(a) 2015

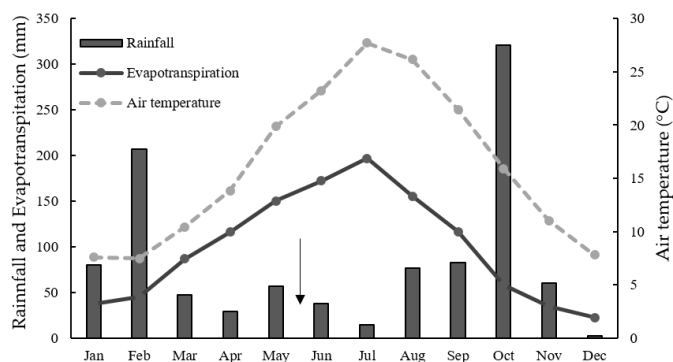

(b) 2016

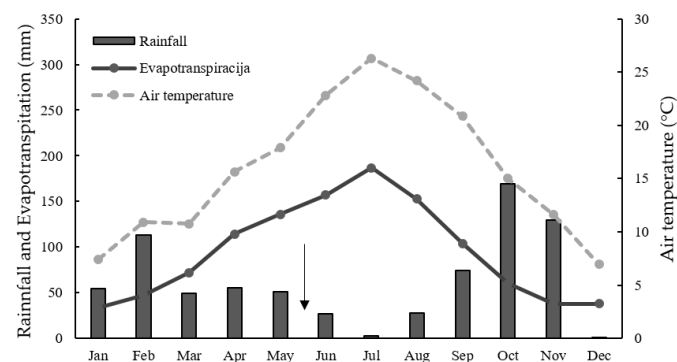

(c) 2017

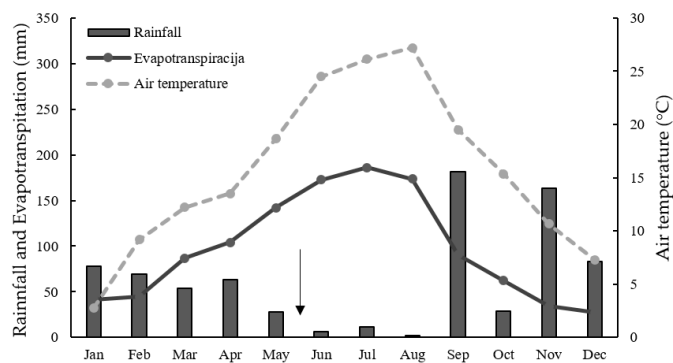

(d) 1988-2017

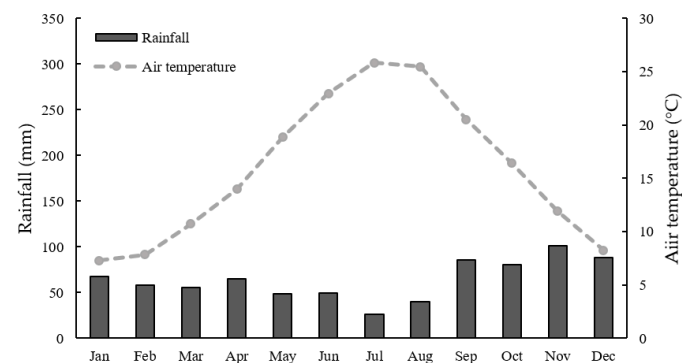

\*Arrow indicates beginning of the irrigation period
